# Supplementary material for: Valorisation of Chitosan Natural Building Block as a Primary Strategy for the Development of Sustainable Fully Bio-Based Epoxy Resins
Source: MDPI journal article supplement (doi:10.3390/polym15244627), 2023-12-06
Supplement: s1 [file s1]

# Supporting Information

## Valorisation of Chitosan Natural Building Block as a Primary Strategy for the Development of Sustainable Fully Bio-Based Epoxy Resins

Iolanda Fusteş-Dămoc<sup>1,2</sup>, Roxana Dinu<sup>1</sup>, Teodor Măluţan<sup>2,\*</sup> and Alice Mija<sup>1,\*</sup>

<sup>1</sup> University Côte d'Azur, Institute of Chemistry of Nice (ICN), UMR CNRS 7272, 06108 Nice, France

<sup>2</sup> "Cristofor Simionescu" Faculty of Chemical Engineering and Environmental Protection, "Gheorghe Asachi" Technical University of Iasi, 73 Prof. D. Mangeron Street, 700050 Iasi, Romania

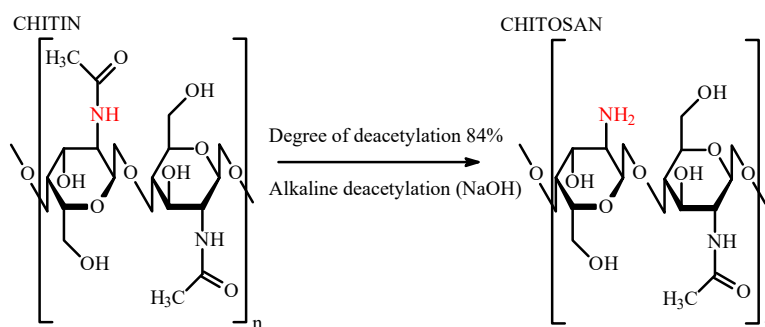

Figure S1. Alkaline deacetylation of chitin.

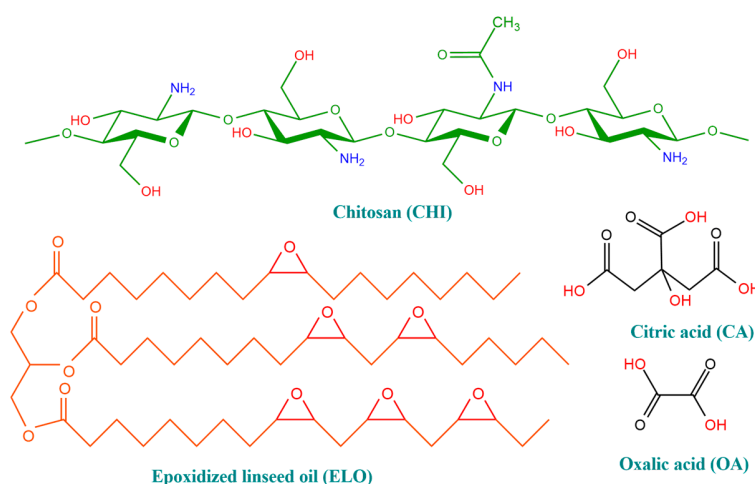

Figure S2. Chemical structures of the reactants.



|             |                                                            |                  |
|-------------|------------------------------------------------------------|------------------|
|             | Oxirane ring, C–O or C–H wagging of epoxy groups           | 847-826          |
| Citric acid | O–H stretching (COOH), H bonding                           | 3500-2500        |
|             | C=O stretching mode in the carboxylic dimer                | 1750, 1689       |
|             | scissoring type –CH <sub>2</sub> bending vibration         | 1424             |
|             | C–O–C scissoring vibration                                 | 1390             |
|             | C–O vibrations                                             | 1281, 1207, 1105 |
| Oxalic acid | COOH                                                       | 897              |
|             | –OH stretch, H bonding                                     | 3430-2500        |
|             | C=O stretching                                             | 1689             |
|             | β (OH) symmetric stretching                                | 1343             |
|             | –OH asymmetric stretching                                  | 1166             |
| Chitosan    | COOH                                                       | 792              |
|             | N–H, O–H stretching, H bonding                             | 3361, 3287       |
|             | C–H stretching                                             | 2859             |
|             | Amide band I C=O                                           | 1649             |
|             | Amide band II –NH <sub>2</sub> due to deacetylation        | 1554             |
|             | Amide band III- C–N                                        | 1377             |
|             | bridge –O– stretch; Saccharide structure of chitosan C–O–C | 1153             |
|             | C–O stretch, secondary hydroxyl group                      | 1057             |
|             | C–O stretch, primary hydroxyl group                        | 1023             |
|             | Pyranose ring                                              | 894              |

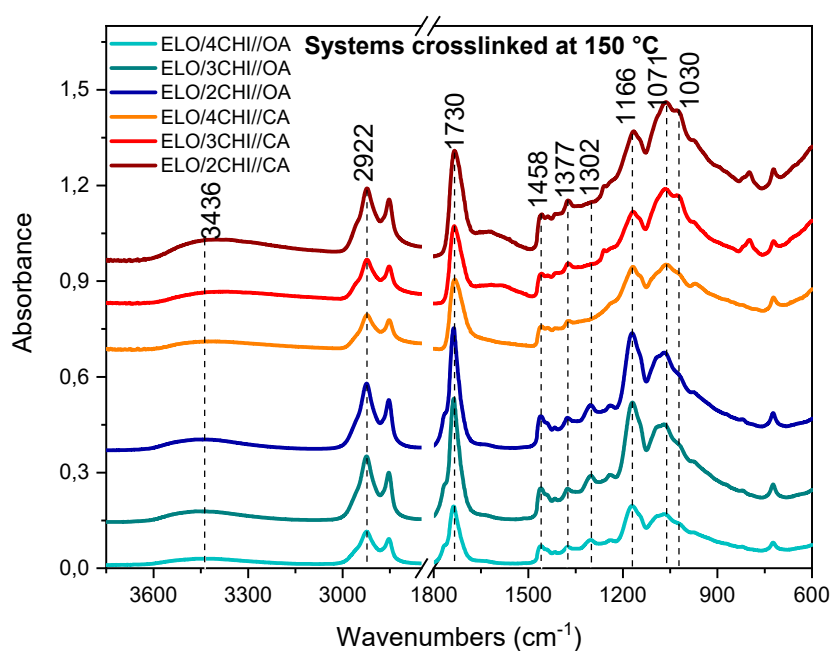

Figure S4. FT-IR spectra for crosslinked bio-resins.

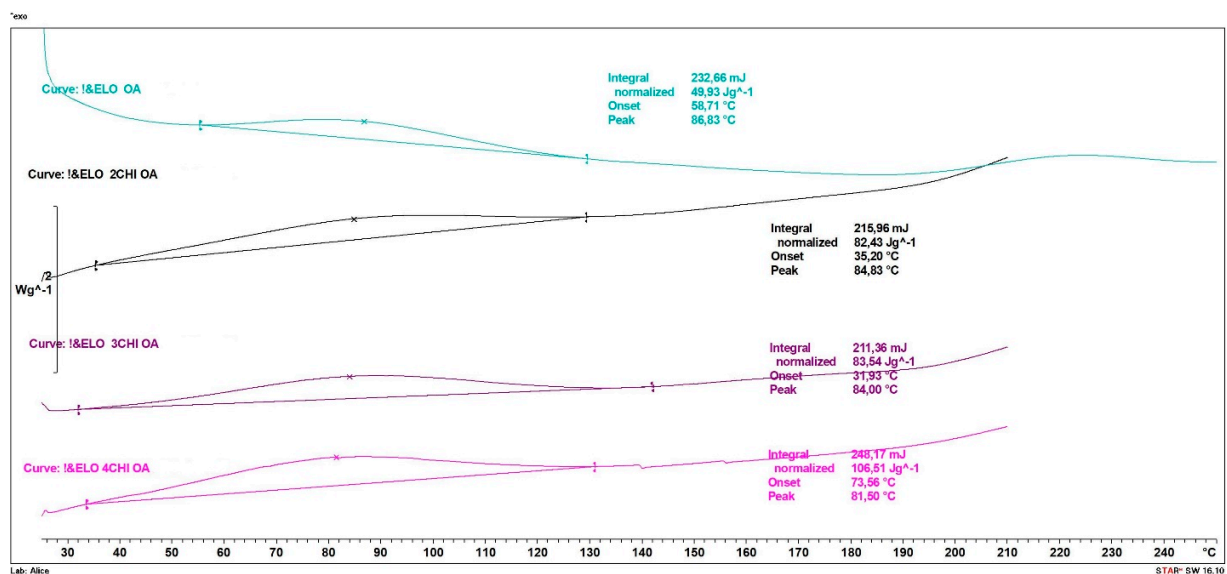

Figure S5. Dynamic DSC thermograms for ELO//OA systems with different percentage of chitosan

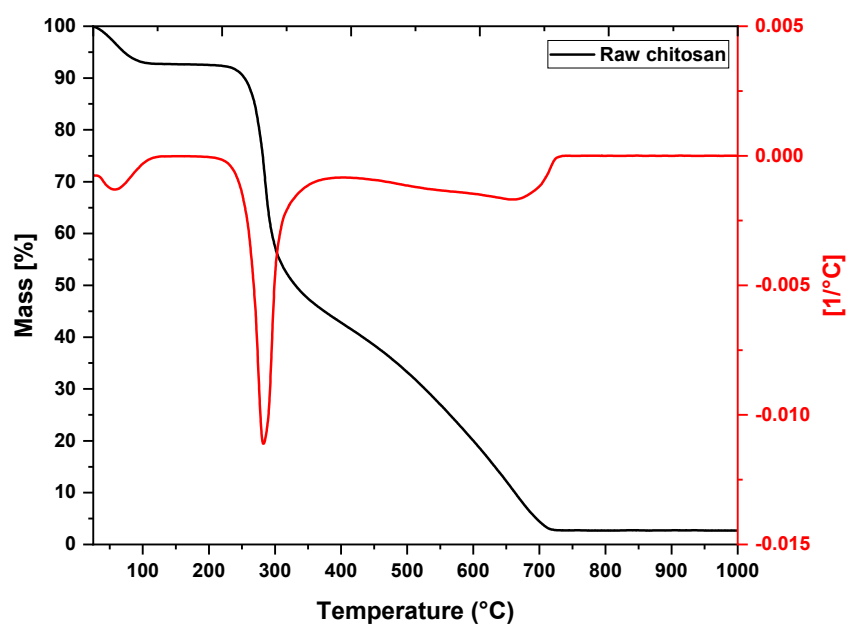

Figure S6. TGA and DTG curves of the raw chitosan.

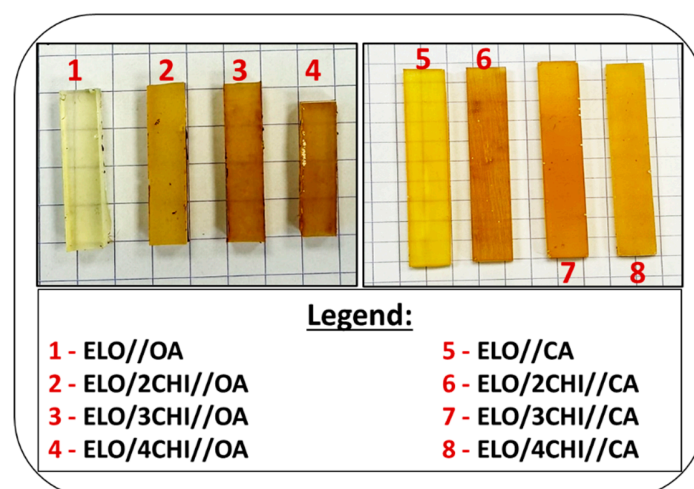

Figure S7. Physical appearance of the biobased thermosets
